# Supplementary material for: A new green catalyst: 1,3,5-triazine-functionalized bisimidazolium dichloride tethered SPION catalyzed Betti synthesis
Source: Royal Society of Chemistry journal article supplement (doi:10.1039/c2cy20187a), 2012-01-01
Supplement: c2cy20187a.pdf [file c2cy20187a.pdf]

Supplementary Materials for *Catal. Sci. Technol.*

**A new green catalyst: 1,3,5-Triazine-functionalized bisimidazolium dichloride tethered SPIONs catalyzed Betti synthesis**

Mehdi Shafiee, Ahmad R. Khosropour,\* Iraj Mohammadpoor-Baltork,\* Majid Moghadam, Shahram Tangestaninejad, Valiollah Mirkhani

*Catalysis Division, Department of Chemistry, Faculty of Science, University of Isfahan, Isfahan 81746-7344, Iran*

**Fig. S1** Comparison of FIIR spectrums of (a)  $\text{Fe}_3\text{O}_4$ ; (b) silica-encapsulated  $\text{Fe}_3\text{O}_4$ ; (c)  $\text{Cl-ACl}_2$  and (d)  $\text{SPION-ACl}_2$

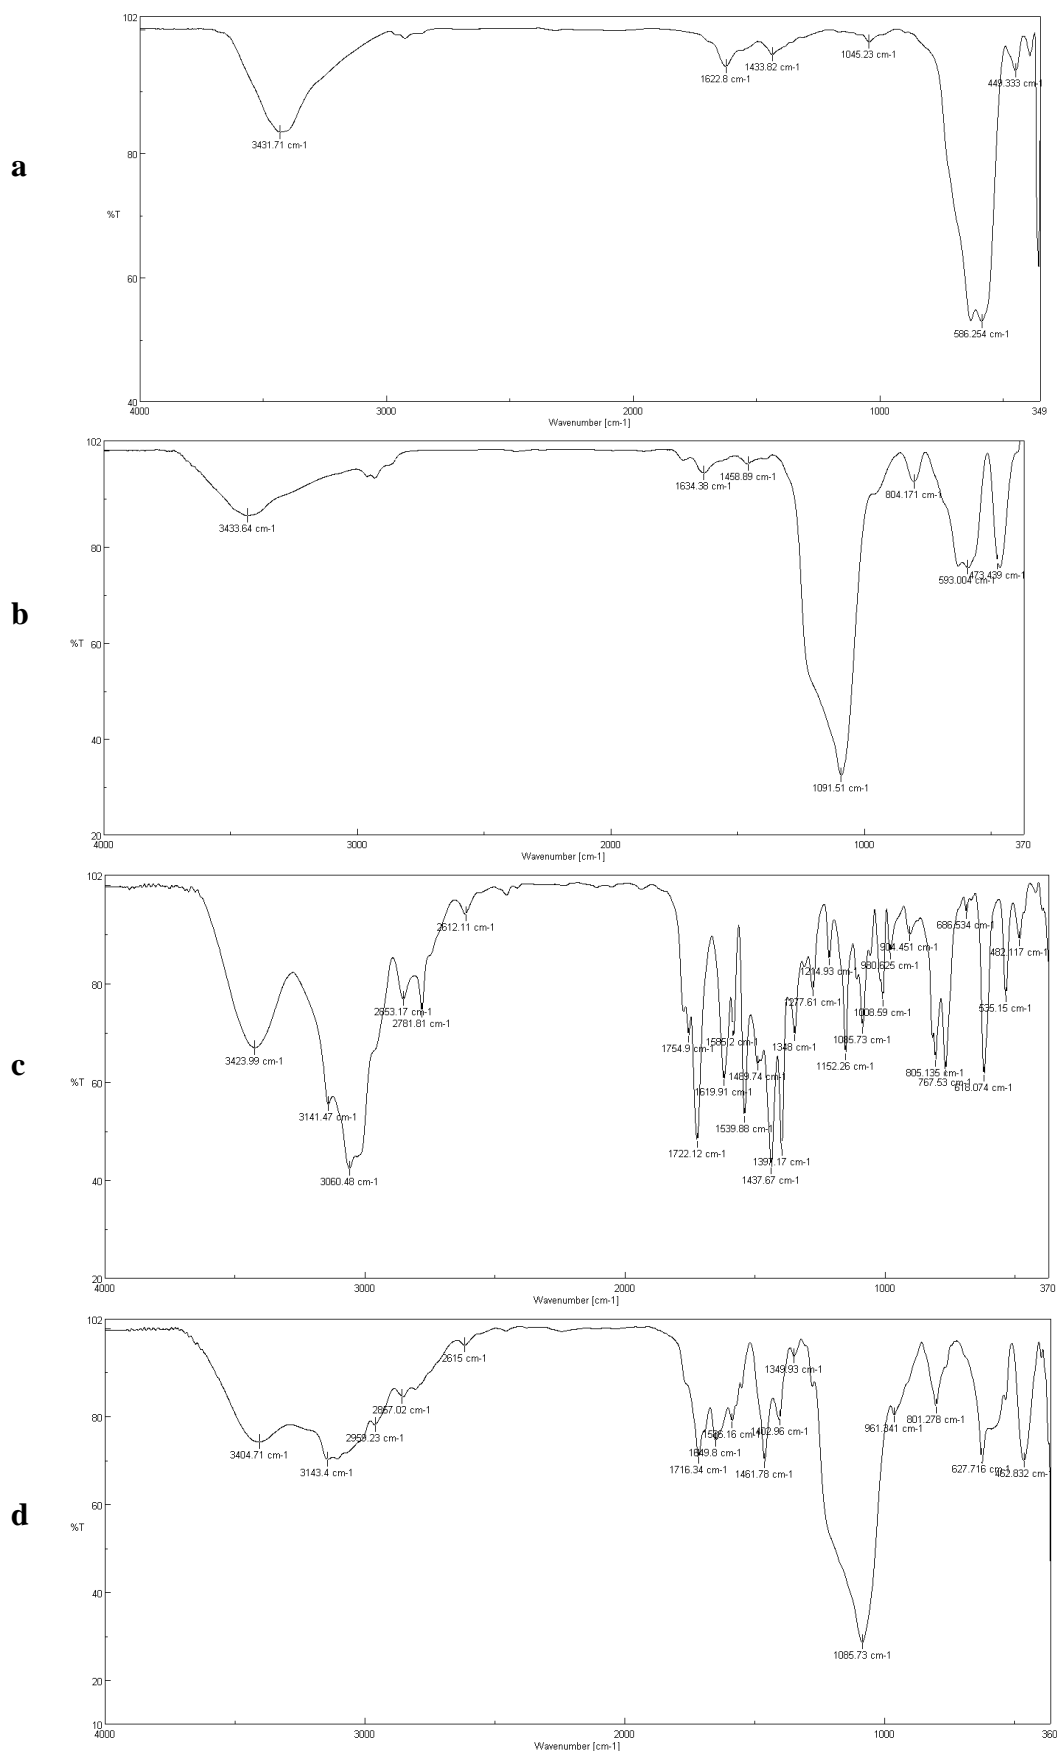

**Fig. S2** TG-DTG analysis of **SPION- $\text{AlCl}_2$**

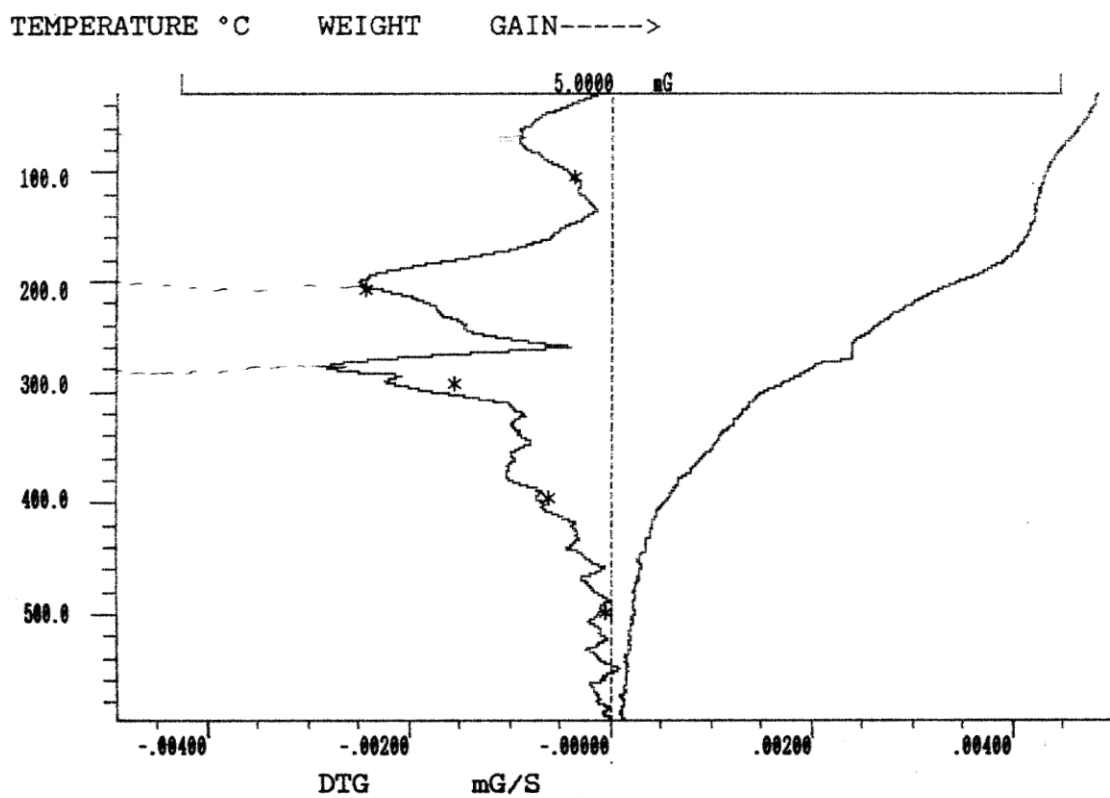

**Fig. S3** The dc magnetic characterization of (a) silica-encapsulated Fe<sub>3</sub>O<sub>4</sub> nanoparticles and (b) SPION-ACl<sub>2</sub>

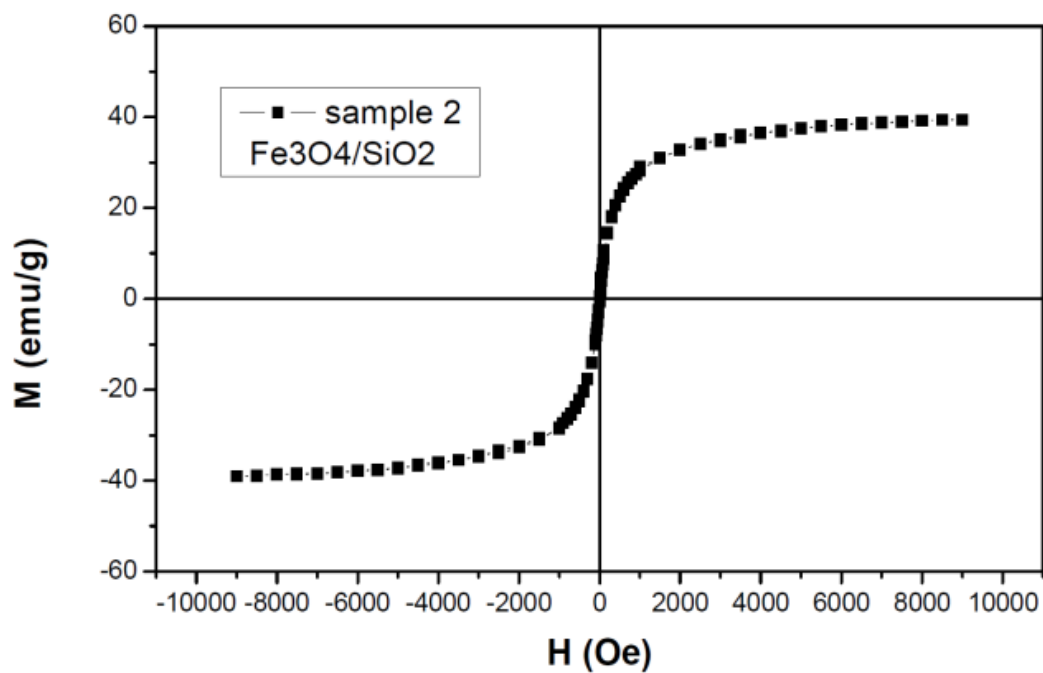

a

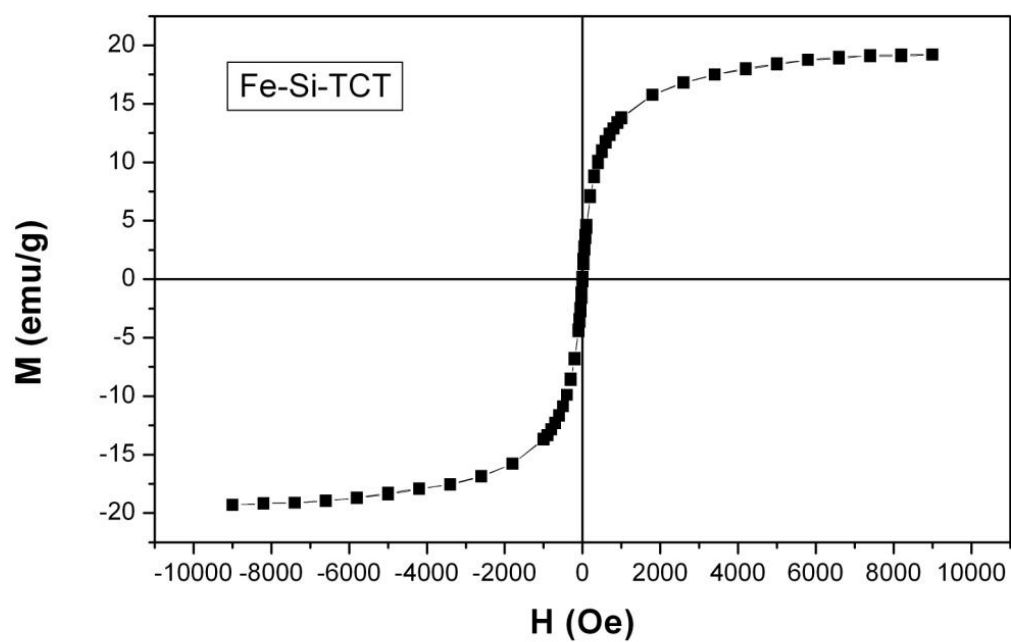

b
